# Supplementary material for: Finding a new pathway for acid-induced nitrite reduction reaction: formation of nitric oxide with hydrogen peroxide
Source: Royal Society of Chemistry journal article supplement (doi:10.1039/c9dt02834j), 2019-01-01
Supplement: c9dt02834j1.pdf [file c9dt02834j1.pdf]

## Supporting Information

### **Finding a new pathway for acid-induced nitrite reduction reaction: formation of nitric oxide with hydrogen peroxide**

Mohammed Ajmal P. Y.<sup>||†</sup> Somnath Ghosh,<sup>||†</sup> Mahesh Yenuganti, Yatheesh

Narayan,<sup>†</sup> Munendra Yadav,<sup>§</sup> Subash Chandra Sahoo<sup>‡</sup> Pankaj Kumar<sup>\*†</sup>

<sup>†</sup>Department of Chemistry, Indian Institute of Science Education and Research (IISER),  
Tirupati 517507, India

<sup>‡</sup>Department of Chemistry, Punjab University, Punjab, Chandigarh, India

<sup>§</sup>Department of Chemistry, University of Texas at El Paso, El Paso, Texas 79968, United  
States

\* To whom correspondence should be addressed.

E-mail: [pankaj@iisertirupati.ac.in](mailto:pankaj@iisertirupati.ac.in)

## Table of Contents

### Experimental Section

|                                                                                                                                                                                                  |     |
|--------------------------------------------------------------------------------------------------------------------------------------------------------------------------------------------------|-----|
| Materials and Instrumentation                                                                                                                                                                    | S3  |
| Synthesis of [(12-TMC)Co <sup>II</sup> (ACN)](BF <sub>4</sub> ) <sub>2</sub> ( <b>1</b> )                                                                                                        | S3  |
| Synthesis of [(12-TMC)Co <sup>II</sup> (NO <sub>2</sub> )](BF <sub>4</sub> ) ( <b>2</b> )                                                                                                        | S4  |
| Synthesis of [(12-TMC)Co <sup>II</sup> ( <sup>15</sup> NO <sub>2</sub> )](BF <sub>4</sub> ) ( <b>2</b> - <sup>15</sup> NO <sub>2</sub> )                                                         | S4  |
| Synthesis of complex <b>4</b> in the reaction reaction of [(12-TMC)Co <sup>II</sup> (NO <sub>2</sub> )](BF <sub>4</sub> ) <sub>2</sub> + 1 equivalent Acid (HClO <sub>4</sub> , H <sup>+</sup> ) | S5  |
| Synthesis of [(12-TMC)Co <sup>III</sup> (NO)](BF <sub>4</sub> ) <sub>2</sub> ( <b>5</b> )                                                                                                        | S5  |
| Reactivity Studies                                                                                                                                                                               | S5  |
| Solution IR Spectroscopy                                                                                                                                                                         | S6  |
| <sup>15</sup> N-labeling Experiments by FT-IR Spectroscopy                                                                                                                                       | S6  |
| EPR spectroscopy                                                                                                                                                                                 | S7  |
| Nitrite Reduction and <sup>15</sup> N-labeling Experiments by ESI-Mass Spectrometry                                                                                                              | S7  |
| Qualitative and quantitative estimation of H <sub>2</sub> O <sub>2</sub> by <sup>1</sup> H-NMR                                                                                                   | S7  |
| Estimation of H <sub>2</sub> O <sub>2</sub> (Iodometric-titration)                                                                                                                               | S8  |
| Detection of CoII(ONOH)intermediate (•OH radical trapping experiment)                                                                                                                            | S9  |
| Single-Crystal XRD Studies                                                                                                                                                                       | S9  |
| Nitric Oxide Preparation and Purification                                                                                                                                                        | S10 |
| References                                                                                                                                                                                       | S11 |
| Table T1. Crystallographic data for <b>1</b> and <b>2</b>                                                                                                                                        | S12 |
| Table T2. Selected bond lengths (Å) and bond angles (°) for <b>1</b> and <b>2</b>                                                                                                                | S13 |
| Table T3. Crystallographic data for <b>4</b> and <b>5</b>                                                                                                                                        | S14 |
| Table T4. Selected bond lengths (Å) and bond angles (°) for <b>4</b> and <b>5</b>                                                                                                                | S15 |
| Fig. S1                                                                                                                                                                                          | S16 |
| Fig. S2                                                                                                                                                                                          | S17 |
| Fig. S3                                                                                                                                                                                          | S18 |
| Fig. S4                                                                                                                                                                                          | S19 |
| Fig. S5                                                                                                                                                                                          | S20 |
| Fig. S6                                                                                                                                                                                          | S21 |
| Fig. S7                                                                                                                                                                                          | S22 |
| Fig. S8                                                                                                                                                                                          | S23 |
| Fig. S9                                                                                                                                                                                          | S24 |
| Fig. S10                                                                                                                                                                                         | S25 |
| Fig. S11                                                                                                                                                                                         | S26 |
| Fig. S12                                                                                                                                                                                         | S27 |
| Fig. S13                                                                                                                                                                                         | S28 |
| Fig. S14                                                                                                                                                                                         | S29 |
| Fig. S15                                                                                                                                                                                         | S30 |
| Fig. S16                                                                                                                                                                                         | S31 |
| Fig. S17                                                                                                                                                                                         | S32 |
| Fig. S18                                                                                                                                                                                         | S33 |

## Experimental Section

**Materials.** All reagents and solvents obtained from commercial sources (Sigma Aldrich Chemical Co. and Tokyo Chemical Industry) were of the best available purity and used without further purification unless otherwise indicated. Solvents were dried according to reported literature and distilled under inert atmosphere before use.<sup>S1</sup> Na<sup>15</sup>NO<sub>2</sub> (99.2% <sup>15</sup>N-enriched) was purchased from ICON Services Inc. (Summit, NJ, USA). The 12-TMC ligand was prepared by reacting excess amounts of formaldehyde and formic acid with 1,4,7,10-tetraazacyclododecane as reported previously.<sup>S2</sup>

**Instrumentation.** UV-vis spectra were recorded on a Hewlett-Packard 8453 diode array spectrometer equipped with a thermostat cell holder (UNISOKU Scientific Instruments) designed for low-temperature experiments. FT-IR spectra in solid form were recorded on Bruker-Alpha Eco-ATR FTIR spectrometer using standard KBr disk method. The solution IR spectra were recorded on the Cary 630 spectrophotometer in the frequency range of 400 – 4000 cm<sup>-1</sup> using demountable liquid-cell kit having round KBr cell window (32 mm). <sup>1</sup>H-NMR spectra were measured with a Bruker model Ascend 400 FT-NMR spectrometer. Electrospray ionization mass spectra (ESI-MS) were recorded on an Agilent Mass Spectrometer (6200 series TOF/6500 series Q-TOF B.08.00), by infusing samples directly into the source using a manual method. The spray voltage was set at 4.2 kV and the capillary temperature at 80 °C. EPR spectral data were collected using an X-band Bruker EMX-plus spectrometer equipped with a dual mode cavity at 100 K. GC-MS analysis were recorded on an Agilent 7890B GC system equipped with 5977B MSD Mass analyser.

**Synthesis of [(12-TMC)Co<sup>II</sup>(ACN)](BF<sub>4</sub>)<sub>2</sub> (1).** CH<sub>3</sub>CN solution (5 mL) of Cobalt(II) tetrafluoroborate hexahydrate (409 mg, 1.2 mmol) was added to a 20 ml CH<sub>3</sub>CN solution of 12-TMC (229 mg, 1 mmol) with constant stirring. The reaction mixture was then refluxed for

12 hours at 80 °C, and the color of the solution changed to wine red after reaction completion. The reaction mixture was dried over a rotary vacuum and then washed with cold methanol several times to remove excess  $[\text{Co}^{\text{II}}(\text{H}_2\text{O})_6](\text{BF}_4)_2$ . Diethyl ether (50 mL) was added to the resultant semi-solid to precipitate out complex **1** (wine red solid). The precipitate was collected and dried under vacuum over anhydrous  $\text{CaCl}_2$ . To get X-ray quality single crystals, the solid was re-dissolved in  $\text{CH}_3\text{CN}$  layered with diethyl ether and kept at -20 °C, after two days dark brown colored crystals were obtained. Yield: 450 mg (~ 90%). UV:  $\lambda_{\text{max}} = 485 \text{ nm}$  ( $\epsilon = 170 \text{ M}^{-1} \text{ cm}^{-1}$ ). FT-IR (KBr pellet): 2925, 1635, 1475, 1084, 755  $\text{cm}^{-1}$ . Mass ( $m/z$ ): Calcd: 374.2, Found: 374.2. EPR: Active with low spin ( $g = 2.35, 2.31 \text{ and } 2.05$ )  $\text{Co}^{\text{II}}$ -ion ( $d^7, S = 1/2$ ).

**Synthesis of  $[(12\text{-TMC})\text{Co}^{\text{II}}(\text{NO}_2)](\text{BF}_4)$  (**2**).** To a 20 ml  $\text{CH}_3\text{CN}$  solution of  $[(12\text{-TMC})\text{Co}^{\text{II}}(\text{ACN})](\text{BF}_4)_2$  (502 mg, 1 mmol), 1 mL aqueous solution of  $\text{NaNO}_2$  (69 mg, 1 mmol) was added slowly with constant stirring. The mixture was stirred for one hour at RT (298 K) until the color of the solution changed from wine red to light pink indicating completion of the reaction. The volume of the reaction mixture was decreased to 10 mL over rotary vacuum and then layered with diethyl ether and kept for crystallization at -20 °C. Yield: 400 mg (~ 95%). UV:  $\lambda_{\text{max}} = 535 \text{ nm}$  ( $\epsilon = 24 \text{ M}^{-1} \text{ cm}^{-1}$ ). FT-IR (KBr pellet): 2925, 1271, 1084, 755  $\text{cm}^{-1}$ . Mass ( $m/z$ ): Calcd: 333.1, Found: 333.1.

**Synthesis of  $[(12\text{-TMC})\text{Co}^{\text{II}}(^{15}\text{NO}_2)](\text{BF}_4)$  (**2- $^{15}\text{NO}_2$** ).** The synthetic procedure of **2- $^{15}\text{NO}_2$**  is similar to that of **2- $^{14}\text{NO}_2$** . Complex **1** (50.2 mg, 0.1 mmol) dissolved in 5 ml distilled  $\text{CH}_3\text{CN}$ ,  $\text{Na}^{15}\text{NO}_2$  (7 mg, 0.1 mmol) was added slowly with constant stirring. The mixture was then stirred for 30 minutes at RT, after reaction completion, the color of the solution changed to dark brown to light pink. The complex was dried under rotary vacuum, washed with cold methanol and diethyl ether, and again dried under vacuum over anhydrous  $\text{CaCl}_2$ . Yield: ~ 35

mg (~ 85%). UV:  $\lambda_{max} = 535 \text{ nm}$  ( $\epsilon = 24 \text{ M}^{-1} \text{ cm}^{-1}$ ). FT-IR (KBr pellet): 2925, 1245, 1084, 755  $\text{cm}^{-1}$ . Mass ( $m/z$ ): Calcd: 334.2, Found: 334.2.

**Synthesis of complex 4 in the reaction of [(12-TMC)Co<sup>II</sup>(NO<sub>2</sub>)](BF<sub>4</sub>)<sub>2</sub> + 1 equivalent Acid (HClO<sub>4</sub>, H<sup>+</sup>).** Complex 2 with the equimolar amount of perchloric acid (HClO<sub>4</sub>) in both CH<sub>3</sub>CN and H<sub>2</sub>O to confirm the reaction product of nitrite reduction reaction. To confirm the end product, complex 2 was reacted with one equivalent of perchloric acid (HClO<sub>4</sub>, H<sup>+</sup>) in CH<sub>3</sub>CN at RT under Ar. The color of the above reaction mixture changed to light pink from wine red upon addition of one equivalent H<sup>+</sup>, over a time period of one hour, indicating the formation of 4. The end product, obtained in the reaction of 2 and H<sup>+</sup>, was determined to be Co<sup>III</sup>-NO<sup>-</sup> from various spectroscopic and structural characterization. The deep wine red colored crystals were obtained on keeping the solution layered with Et<sub>2</sub>O, at -20 °C for 5 days. UV:  $\lambda_{max} = 370 \text{ nm}$  ( $\epsilon = 760 \text{ M}^{-1} \text{ cm}^{-1}$ ). FT-IR (KBr pellet): 2925, 1703, 1100, 1077  $\text{cm}^{-1}$ . Mass ( $m/z$ ): Calcd: 404.2, Found: 404.2 ([[(12-TMC)Co<sup>III</sup>(NO)(BF<sub>4</sub>)]<sup>+</sup>]) and calcd: 416.1, Found: 416.1 ([[(12-TMC)Co<sup>III</sup>(NO)(ClO<sub>4</sub>)]<sup>+</sup>]). EPR: Silent.

**Synthesis of [(12-TMC)Co<sup>III</sup>(NO)](BF<sub>4</sub>)<sub>2</sub> (5).** The Ar saturated CH<sub>3</sub>CN solution (10 mL) containing [(12-TMC)Co<sup>II</sup>](BF<sub>4</sub>)<sub>2</sub> (0.461 g, 1 mmol) was purged with an excess of NO for 5 min; the color of the solution was changed from light pink to wine red color. The reaction mixture was kept for 30 min and then layered with Ar saturated ether. Deep wine red colored crystals [(12-TMC)Co<sup>III</sup>(NO)](BF<sub>4</sub>)<sub>2</sub> were obtained by slow diffusion after several days by at -20 °C. UV:  $\lambda_{max} = 370 \text{ nm}$  ( $\epsilon = 800 \text{ M}^{-1} \text{ cm}^{-1}$ ). FT-IR (KBr pellet): 2925, 1703, 1084  $\text{cm}^{-1}$ . Mass ( $m/z$ ): Calcd: 404.2, Found: 404.2 ([[(12-TMC)Co<sup>III</sup>(NO)(BF<sub>4</sub>)]<sup>+</sup>]). EPR: Silent. <sup>1</sup>H-NMR: active (Figure S6e).

**Reactivity Studies.** All UV-vis spectral measurements were run in a UV cuvette in CH<sub>3</sub>CN or aqueous solutions under Ar at RT. All kinetic reactions were run at least three times, and the

data reported here are the average outcome for these reactions. We have performed all the reaction in the degassed solutions under Ar to avoid the interaction/reaction of dioxygen with nitrosyl /or nitric oxide. Formation of complex **4** and H<sub>2</sub>O<sub>2</sub> in the reactions were identified by comparing with authentic samples, and product yields were determined by comparison against standard curves prepared with authentic samples.

**Solution IR Spectroscopy.** FT-IR grade KBr cells were used to record solution phase IR spectra in Ar saturated CH<sub>3</sub>CN at RT. The formation of the complex (**4**), in the reaction of **2** (5.0 mM) with 1 equivalent of HClO<sub>4</sub>, was followed by monitoring the characteristic Co<sup>III</sup>NO<sup>-</sup> stretching. The Co<sup>II</sup>-bound nitrite peak (1300 cm<sup>-1</sup>) instantly changed to a new peak 1284 cm<sup>-1</sup>, which is supposed to be an intermediate (Co<sup>II</sup>-ONOH, **3**), upon addition of one fold HClO<sub>4</sub>. The generation of **4** was confirmed by the gradual formation of a peak at 1710 cm<sup>-1</sup>, characteristic of Co<sup>III</sup>NO<sup>-</sup> stretching frequency, with the gradual disappearance of the intermediate peak (1284 cm<sup>-1</sup>) over a time period of 1 hour.

**<sup>15</sup>N-labeling Experiments by FT-IR Spectroscopy.** In addition to solution IR, we have recorded the IR spectra of the different complexes in their solid form as KBr pellet to follow the source of nitrogen. The IR spectra of complex **2** showed a nitrite (<sup>14</sup>NO<sub>2</sub><sup>-</sup>) characteristic peak at 1271 cm<sup>-1</sup>, which shifted to 1245 cm<sup>-1</sup> when prepared with <sup>15</sup>N-labeled nitrite (<sup>15</sup>NO<sub>2</sub><sup>-</sup>). The change in the IR stretching frequency of cobalt bound nitrite ( $\Delta = 26 \text{ cm}^{-1}$ ) confirmed clearly that increase in the reduced mass of nitrogen atom (<sup>14</sup>N to <sup>15</sup>N) is responsible for the decrease in the stretching frequency of nitrite functional group (Fig. S2). We observed the similar spectral changes when the IR spectra of cobalt bound nitrosyl complex recorded with <sup>14</sup>N and <sup>15</sup>N-labeled cobalt nitrosyl complexes. The IR spectra of complex **4** showed a characteristic nitrosyl stretching frequency at 1703 cm<sup>-1</sup> (<sup>14</sup>N) which shifted to 1673 cm<sup>-1</sup> (<sup>15</sup>N,  $\Delta = 30 \text{ cm}^{-1}$ ) when exchanged with <sup>15</sup>N-labeled nitrosyl functional group (Fig. S7).

**EPR spectroscopy.** The EPR spectral measurements were performed to identify/characterized the oxidation state of cobalt metal center in different complexes and to follow the formation of the intermediate (**3**) as well as its conversion to the final  $\{\text{CoNO}\}^8$  complex (**4**). For EPR spectral measurements, we used the known concentration (2.0 mM) as otherwise required high concentration to detect the EPR signal for cobalt centers with low signal intensity. All EPR spectral measurements were performed in  $\text{CH}_3\text{CN}$  at 100 K under Ar atmosphere. Time-dependent EPR spectra of  $\text{Co}^{\text{II}}\text{-ONOH}$  intermediate (**3**; black line) formation and decomposition, in the reaction of complex **2** (2.0 mM) and one equivalent  $\text{H}^+$ , were recorded in the frozen  $\text{CH}_3\text{CN}$  solutions as a function of time (0, 1, 10, 20, 30, 40, 50, and 60 min) at 100 K.

**Nitrite Reduction and  $^{15}\text{N}$ -labeling Experiments by ESI-Mass Spectrometry.** To establish the source of nitrogen, complex **2** with  $^{15}\text{N}$ -labeled nitrite ( $[(12\text{-TMC})\text{Co}^{\text{II}}(^{15}\text{NO}_2)]^+$ ), was reacted with one fold  $\text{HClO}_4$  in  $\text{CH}_3\text{CN}$  under Ar at 298 K. For above experiment, a schlenk tube (25 mL) containing a solution of **2** (0.5 mM / 10 mL) in  $\text{CH}_3\text{CN}$  sealed with a rubber septum under an Ar was reacted with one fold acid. The reaction mixture was kept for one hour, and then ESI mass spectra of the reaction mixture were recorded.

**Qualitative and quantitative estimation of  $\text{H}_2\text{O}_2$  by  $^1\text{H}$ -NMR.** To confirm the  $\text{H}_2\text{O}_2$  formation in the reaction of **2** with one fold  $\text{HClO}_4$ , we have monitored the reaction by  $^1\text{H}$ -NMR spectroscopy. We know that cobalt metal center, being tri-cationic and diamagnetic (low-spin,  $d^6$ ), in  $[(12\text{-TMC})\text{Co}^{\text{III}}(\text{NO})]^+$  does not participate in the paramagnetic quenching of  $^1\text{H}$ -NMR signals of attached ligand (12TMC) and  $\text{H}_2\text{O}_2$ . In this regard, the  $^1\text{H}$ -NMR spectrum of complex **2** (8.4 mg / 500  $\mu\text{L}$ , 40 mM) with one fold  $\text{HClO}_4$  in  $\text{CD}_3\text{CN}$  showed a signal at 8.66 ppm, corresponds to  $\text{H}_2\text{O}_2$  (Fig. S11a). We compared the  $^1\text{H}$ -NMR spectrum of the  $\text{H}_2\text{O}_2$  formed in the above reaction with the authentic samples,  $\text{H}_2\text{O}_2$  only (8.66 ppm; Fig. S12) and

H<sub>2</sub>O<sub>2</sub> plus **5** (8.66 ppm; Fig. S11b), which confirmed the formation of H<sub>2</sub>O<sub>2</sub> and also validates our hypothesis of H<sub>2</sub>O<sub>2</sub> formation in the nitrite reduction chemistry. Additionally, we have calculated the amount of H<sub>2</sub>O<sub>2</sub> formation by comparing peak integral corresponding to H<sub>2</sub>O<sub>2</sub> (8.66 ppm) of the reaction mixture (**2** + HClO<sub>4</sub>) with the authentic sample (20 mM H<sub>2</sub>O<sub>2</sub> + **5**) containing an internal standard Benzene (8.66 ppm; Fig. S11b). Also, we have observed the formation of 12TMC ligand protons <sup>1</sup>H-NMR signals, which suggest the tri-valence and diamagnetic behavior of cobalt center in complex **5** (Fig. S9).

| S. No. | Sample                                         | Integral of benzene peak<br>(7.37 ppm)<br>(A) | Integral of H <sub>2</sub> O <sub>2</sub> peak<br>(8.66 ppm)<br>(B) | Ratio<br>(B) / (A) |
|--------|------------------------------------------------|-----------------------------------------------|---------------------------------------------------------------------|--------------------|
| 1      | 20 mM H <sub>2</sub> O <sub>2</sub> + <b>5</b> | 6                                             | 4.60                                                                | 0.766              |
| 2      | <b>2</b> + 1 equiv. H <sup>+</sup>             | 6                                             | 2.41                                                                | 0.402              |
| 3      | <b>2</b> + 1 equiv. H <sup>+</sup>             | 6                                             | 2.37                                                                | 0.395              |
| 4      | <b>2</b> + 1 equiv. H <sup>+</sup>             | 6                                             | 2.48                                                                | 0.410              |

**Amount of H<sub>2</sub>O<sub>2</sub> formed:**

Sample 1 =  $(0.402 / 0.766) \times 20 \text{ mM} = 10.5 \text{ mM}$  (52.5 %)

Sample 2 =  $(0.395 / 0.766) \times 20 \text{ mM} = 10.3 \text{ mM}$  (51.5 %)

Sample 3 =  $(0.410 / 0.766) \times 20 \text{ mM} = 10.8 \text{ mM}$  (54.0 %)

**H<sub>2</sub>O<sub>2</sub> formed in the reaction (average): = ~ 53.0 %**

**Estimation of H<sub>2</sub>O<sub>2</sub> (Iodometric-titration):** Additionally, the amount of hydrogen peroxide was also determined by titration with iodide ion. Hydrogen peroxide was generated in the reaction of complex **2** (250 μL, 1 mM) with one equivalent of perchloric acid (25 μL, 10 mM) in 2.5 mL CH<sub>3</sub>CN under an argon atmosphere at room temperature. The reaction solution was treated along with an excess of sodium iodide (100 μL/2.5 mL CH<sub>3</sub>CN, 4mM) under argon atmosphere and the UV-visible spectrum were recorded for the reaction (Figure S13a). The



quantity of  $I_3^-$  formed, in the reaction was determined at 361 nm as a result of  $I_3^-$  ( $\lambda$  max 361 nm,  $\epsilon = 2.5 \times 10^4 \text{ M}^{-1} \text{ cm}^{-1}$ ) as explained below.

**Amount of H<sub>2</sub>O<sub>2</sub> formed:**

Sample 1 = (Abs. = 1.1) = 0.0324 mM (~ 65 % of H<sub>2</sub>O<sub>2</sub>)

Sample 2 = (Abs. = 1.05) = 0.0322 mM (~ 64 % of H<sub>2</sub>O<sub>2</sub>)

Sample 3 = (Abs. = 1.18) = 0.0327 mM (~ 66 % of H<sub>2</sub>O<sub>2</sub>)

**H<sub>2</sub>O<sub>2</sub> formed in the reaction (average): = ~ 64.0 %**

Also, the generation of hydrogen peroxide in the reaction of complex **2** (250  $\mu$ L, 1 mM) with four equivalent of perchloric acid (100  $\mu$ L, 10 mM) was determined under similar conditions. The reaction solution was treated along with an excess of sodium iodide (100  $\mu$ L/2.5 mL CH<sub>3</sub>CN, 4mM) under argon atmosphere and the UV-visible spectrum were recorded for the reaction (Figure S13b).

**H<sub>2</sub>O<sub>2</sub> formed in the reaction (average): = ~ 55.0 %**

The amount of H<sub>2</sub>O<sub>2</sub>, remaining after the spin trap experiment, was found to be negligible, which was detected by Iodometric test. In this regards, we have reacted complex **2** (1.0 mM) with 2,4-DTBP (1.0 mM) in presence of 1 fold perchloric acid in acetonitrile at RT under Ar. After completion of the reaction, the reaction solution (250  $\mu$ L, 1 mM) was treated along with an excess of sodium iodide (100  $\mu$ L/2.5 mL CH<sub>3</sub>CN, 4mM) under Ar atmosphere and the UV-visible spectrum were recorded for the reaction (Figure S13c). In the trapping reaction, almost all  $\bullet$ OH radicals had been consumed by excess 2,4- DTBP to form various 2,4-DTBP derivatives, and hence the formation H<sub>2</sub>O<sub>2</sub> was not observed.

**Detection of Co<sup>II</sup>(ONOH)intermediate ( $\bullet$ OH radical trapping experiment):** To confirm the N–O bond homolysis and the formation of free  $\bullet$ OH radical, we have performed the  $\bullet$ OH radical trapping experiment using 2,4-di-tert-butyl phenol (2,4-DTBP). For this reaction, we

have reacted complex **2** (1.0 mM) with 2,4-DTBP (1.0 mM) in presence of 1 fold perchloric acid in acetonitrile at RT under Ar. The reaction mixture was then analysed by GC-MS for identification and amounts quantified by LC against the standard plots of all the compounds. In this experiment, we have observed the formation of 3,5-Di-tert-butylcatechol (3,5-DTBC) with small amounts of 2,4-DTBP-dimer (3,5-DTBP-D) and nitro-2,4-DTBP (nitro-3,5-DTBP) (Figure S14), suggesting the N–O bond homolysis to form free •OH radical and hence indirectly proving the Co<sup>II</sup>-nitous acid intermediate (**3**). The amount of 3,5-DTBC formed in the reaction was found to be ~ 20 % (0.20 mM), accounting for 40 % •OH radical, 2,4-DTBP-D (~ 10 %, 0.05 mM, 10 % •OH radical), and nitro-2,4-DTBP (~ 5 %, 0.05 mM, 15 % •OH radical) in the reaction mixture, because a specific amount of •OH decomposes to other side products due to its high reactivity.

We have also determined the formation of various products (3,5-DTBC, 3,5-DTBP-D, and nitro-2,4-DTBP) in the reaction of 2,4-DTBP with H<sub>2</sub>O<sub>2</sub>, in presence and absence of UV light (•OH radical trapping experiment). In this regards, we have reacted 2,4-DTBP (1.0 mM) with H<sub>2</sub>O<sub>2</sub> (0.5 mM) in acetonitrile at RT under Ar. The reaction mixture was then analysed and quantified by LC against the standard plots of all the compounds. In this reaction, we observed the formation of the dimerized (3,5-DTBP-D, ~ 20 %) and hydroxylated (3,5-DTBC, ~ 15 %) product mixture in the reaction of 2,4- DTBP with H<sub>2</sub>O<sub>2</sub> upon UV exposure. As known from the literature, H<sub>2</sub>O<sub>2</sub> generates the •OH radical upon UV light exposure.<sup>xx</sup> However, when the similar reaction was performed in absence of UV light, we did not observe the formation of above reaction mixture.

**Single-Crystal XRD Studies.** Crystals were mounted on Hampton cryoloops. All geometric and intensity data for the crystals were collected using a Super-Nova (Mo) X-ray diffractometer equipped with a micro-focus sealed X-ray tube Mo-K $\alpha$  ( $\lambda = 0.71073 \text{ \AA}$ ) X-ray

source and HyPix3000 (CCD plate) detector of with increasing  $\omega$  (width of 0.3 per frame) at a scan speed of either 5 or 10 s/frame. The CrysAlisPro software was used for data acquisition and data extraction. Using Olex2<sup>S3</sup>, the structure was solved with the SIR2004<sup>S4</sup> structure solution program using Direct Methods and refined with the ShelXL<sup>S5</sup> refinement package using Least Squares minimisation. All non-hydrogen atoms were refined with anisotropic thermal parameters. Few anions mainly BF<sub>4</sub> ions were found to be highly disordered, and appropriate disordered model applied (Figure S15 and S16). Detail crystallographic data and structural refinement parameters are summarized in Table T1 - T4. CCDC 1900886 (**1**), 1900887 (**2**), 1900888 (**4**), 1882600 (**5**) contains the supplementary crystallographic data for this paper. These data can be obtained free of charge from The Cambridge Crystallographic Data Centre.

**Nitric Oxide Preparation and Purification.** Nitric oxide (NO) was prepared and purified by following a detailed procedure as shown in Fig. S17. First, NO gas was prepared by the reaction of NaNO<sub>2</sub> with H<sub>2</sub>SO<sub>4</sub> under an Argon (Ar) atmosphere and then passed through two different types of column. First, pass through a column filled with NaOH beads to remove higher nitrogen oxides impurities. After that, the gas pass through a set of two columns filled with NaOH beads molecular sieves to remove the minor amount of remaining higher nitrogen oxides and moisture impurities. The highly purified NO gas was then collected in a vacuo Schlenk flask fitted with a rubber septum (free from oxygen; after several cycles of vacuum and Ar purging). High pressure NO gas (with pressure >1 atmosphere; the septum bulges outward due to high pressures) then passed through an Ar saturated (oxygen-free) and dry Acetonitrile (CH<sub>3</sub>CN) solution for 15 minutes. The concentration of NO in the NO saturated CH<sub>3</sub>CN solution is ~14 mM.<sup>S6</sup>

## References

- S1. Armarego, W. L. F.; Chai, C. L. L. *Purification of Laboratory Chemicals*, 6th ed.; Pergamon Press: Oxford, **2009**.
- S2. Halfen, J. A.; Young, V. G., Jr. Efficient Preparation of 1,4,8-trimethylcyclam and its Conversion into a Thioalkyl-pendant Pentadentate Chelate. *Chem. Commun.* **2003**, 2894.
- S3 Dolomanov, O. V.; Bourhis, L. J.; Gildea, R. J.; Howard, J. A. K.; Puschmann, H. OLEX2: a Complete Structure Solution, Refinement and Analysis Program. *J. Appl. Cryst.* **2009**, *42*, 339–341.
- S4 Burla, M. C.; Caliandro, R.; Camalli, M. C., B.; Cascarano, G. L.; De Caro, L.; Giacovazzo, C.; Polidori, G.; Siliqi, D.; Spagna, R. IL MILIONE: A Suite of Computer Programs for Crystal Structure Solution of Proteins. *J. Appl. Cryst.* **2007**, *40*, 609–613.
- S5 G. M. Sheldrick. Crystal Structure Refinement with SHELXL. *Acta Cryst.* **2015**, *C71*, 3–8.
- S6. Young, C. L. *Solubility Data Series Vol. 8 Oxides of Nitrogen*, International Union of Pure and Applied Chemistry (IUPAC), 1981.

**Table T1** Crystallographic data for **1** and **2**.

|                                                     | <b>1</b>                                                                       | <b>2</b>                                                                        |
|-----------------------------------------------------|--------------------------------------------------------------------------------|---------------------------------------------------------------------------------|
| Chemical formula                                    | C <sub>14</sub> H <sub>31</sub> B <sub>2</sub> CoF <sub>8</sub> N <sub>5</sub> | C <sub>12</sub> H <sub>28</sub> BCoF <sub>4</sub> N <sub>5</sub> O <sub>2</sub> |
| Formula weight                                      | 501.99                                                                         | 420.13                                                                          |
| Wavelength /Å                                       | 0.71073                                                                        | 0.71073                                                                         |
| Crystal system                                      | orthorhombic                                                                   | orthorhombic                                                                    |
| Space group                                         | <i>Pnma</i>                                                                    | <i>Pbca</i>                                                                     |
| <i>T</i> , K                                        | 293(2)                                                                         | 123(12)                                                                         |
| <i>a</i> , Å                                        | 14.3880(3)                                                                     | 13.0277(2)                                                                      |
| <i>b</i> , Å                                        | 8.81800(10)                                                                    | 14.5867(2)                                                                      |
| <i>c</i> , Å                                        | 16.9008(3)                                                                     | 19.2369(3)                                                                      |
| $\alpha$ , °                                        | 90                                                                             | 90                                                                              |
| $\beta$ , °                                         | 90                                                                             | 90                                                                              |
| $\gamma$ , °                                        | 90                                                                             | 90                                                                              |
| <i>V</i> / Å <sup>3</sup>                           | 2144.26(6)                                                                     | 3655.61(9)                                                                      |
| <i>Z</i>                                            | 4                                                                              | 8                                                                               |
| Calculated density, g/cm <sup>3</sup>               | 1.555                                                                          | 1.527                                                                           |
| Abs. Coeff. /mm <sup>-1</sup>                       | 0.879                                                                          | 0.994                                                                           |
| Reflections collected                               | 24031                                                                          | 40479                                                                           |
| Unique reflections                                  | 2499                                                                           | 3981                                                                            |
| Refinement method                                   | Least-squares on <i>F</i> <sup>2</sup>                                         | Least-squares on <i>F</i> <sup>2</sup>                                          |
| Data/restraints/parameters                          | 2499/0/210                                                                     | 3981/0/230                                                                      |
| Goodness-of-fit on <i>F</i> <sup>2</sup>            | 1.047                                                                          | 1.071                                                                           |
| Final <i>R</i> indices [ <i>I</i> > 2σ( <i>I</i> )] | <i>R</i> 1 = 0.0322<br>w <i>R</i> 2 = 0.0820                                   | <i>R</i> 1 = 0.0348<br>w <i>R</i> 2 = 0.0882                                    |
| <i>R</i> indices (all data)                         | <i>R</i> 1 = 0.0344<br>w <i>R</i> 2 = 0.0833                                   | <i>R</i> 1 = 0.0397<br>w <i>R</i> 2 = 0.0911                                    |

**Table T2** Selected bond lengths (Å) and bond angles (°) for **1** and **2**.

| <b>1</b>    |            | <b>2</b>  |            |
|-------------|------------|-----------|------------|
| Co1 N3      | 2.023(2)   | Co1 O2    | 2.1208(14) |
| Co1 N21     | 1.9838(14) | Co1 O1    | 2.2098(16) |
| Co1 N2      | 1.9838(14) | Co1 N2    | 2.1813(15) |
| Co1 N11     | 1.9836(15) | Co1 N3    | 2.1781(15) |
| Co1 N1      | 1.9836(15) | Co1 N1    | 2.1562(16) |
|             |            | Co1 N4    | 2.2105(16) |
| N2 Co1 N3   | 100.39(6)  | O2 Co1 O1 | 57.24(6)   |
| N21 Co1 N3  | 100.39(6)  | O2 Co1 N2 | 128.27(6)  |
| N21 Co1 N2  | 87.72(8)   | O2 Co1 N3 | 92.18(6)   |
| N1 Co1 N3   | 101.19(6)  | O2 Co1 N1 | 131.06(6)  |
| N11 Co1 N3  | 101.19(6)  | O2 Co1 N4 | 93.03(6)   |
| N11 Co1 N21 | 88.29(6)   | O1 Co1 N4 | 131.18(6)  |
| N1 Co1 N21  | 158.43(6)  | N2 Co1 O1 | 90.05(6)   |
| N11 Co1 N2  | 158.43(6)  | N2 Co1 N4 | 135.41(6)  |
| N1 Co1 N2   | 88.29(6)   | N3 Co1 O1 | 131.53(6)  |
| N1 Co1 N11  | 87.67(10)  | N3 Co1 N2 | 81.04(6)   |
|             |            | N3 Co1 N4 | 81.44(6)   |
|             |            | N1 Co1 O1 | 91.44(6)   |
|             |            | N1 Co1 N2 | 82.68(6)   |
|             |            | N1 Co1 N3 | 133.61(6)  |
|             |            | O1 N5 O2  | 112.05(16) |
|             |            | N1 Co1 N4 | 80.47(6)   |
|             |            | N5 O2 Co1 | 97.31(11)  |
|             |            | N5 O1 Co1 | 93.35(12)  |

**Table T3** Crystallographic data for **4** and **5**.

|                                                     | <b>4</b>                                                                         | <b>5</b>                                                                        |
|-----------------------------------------------------|----------------------------------------------------------------------------------|---------------------------------------------------------------------------------|
| Chemical formula                                    | C <sub>12</sub> H <sub>28</sub> B <sub>2</sub> CoF <sub>8</sub> N <sub>5</sub> O | C <sub>12</sub> H <sub>28</sub> CoN <sub>5</sub> OB <sub>2</sub> F <sub>8</sub> |
| Formula weight                                      | 490.94                                                                           | 490.94                                                                          |
| Wavelength /Å                                       | 0.71073                                                                          | 0.71073                                                                         |
| Crystal system                                      | orthorhombic                                                                     | orthorhombic                                                                    |
| Space group                                         | <i>Pna21</i>                                                                     | <i>Pna21</i>                                                                    |
| <i>T</i> , K                                        | 293(2)                                                                           | 293(2)                                                                          |
| <i>a</i> , Å                                        | 12.8109(4)                                                                       | 12.8109(4)                                                                      |
| <i>b</i> , Å                                        | 18.5996(6)                                                                       | 18.5996(6)                                                                      |
| <i>c</i> , Å                                        | 8.9913(3)                                                                        | 8.9913(3)                                                                       |
| $\alpha$ , °                                        | 90                                                                               | 90                                                                              |
| $\beta$ , °                                         | 90                                                                               | 90                                                                              |
| $\gamma$ , °                                        | 90                                                                               | 90                                                                              |
| <i>V</i> / Å <sup>3</sup>                           | 2142.43(12)                                                                      | 2142.43(12)                                                                     |
| <i>Z</i>                                            | 4                                                                                | 4                                                                               |
| Calculated density, g/cm <sup>3</sup>               | 1.522                                                                            | 1.522                                                                           |
| Abs. Coeff. /mm <sup>-1</sup>                       | 0.881                                                                            | 0.881                                                                           |
| Reflections collected                               | 18328                                                                            | 18328                                                                           |
| Unique reflections                                  | 3701                                                                             | 3701                                                                            |
| Refinement method                                   | Least-squares on <i>F</i> <sup>2</sup>                                           | Least-squares on <i>F</i> <sup>2</sup>                                          |
| Data/restraints/parameters                          | 3701/46/390                                                                      | 3701/187/374                                                                    |
| Goodness-of-fit on <i>F</i> <sup>2</sup>            | 1.049                                                                            | 1.058                                                                           |
| Final <i>R</i> indices [ <i>I</i> > 2σ( <i>I</i> )] | R1 = 0.0487<br>wR2 = 0.1260                                                      | R1 = 0.0541<br>wR2 = 0.1434                                                     |
| <i>R</i> indices (all data)                         | R1 = 0.0707<br>wR2 = 0.1429                                                      | R1 = 0.0758<br>wR2 = 0.1611                                                     |

**Table T4** Selected bond lengths (Å) and bond angles (°) for **4** and **5**.

| <b>4</b>  |           | <b>5</b>  |           |
|-----------|-----------|-----------|-----------|
| Co1 N5    | 1.753(6)  | Co1 N1    | 2.002(11) |
| Co1 N1    | 2.010(10) | Co1 N2    | 1.965(12) |
| Co1 N2    | 1.987(11) | Co1 N5    | 1.744(6)  |
| Co1 N3    | 1.961(11) | Co1 N3    | 1.984(12) |
| Co1 N4    | 1.961(11) | Co1 N4    | 1.977(11) |
| N5 Co1 N1 | 101.2(6)  | N2 Co1 N1 | 88.4(6)   |
| N5 Co1 N2 | 103.4(6)  | N5 Co1 N1 | 101.1(7)  |
| N5 Co1 N3 | 103.2(6)  | N5 Co1 N2 | 104.5(6)  |
| N5 Co1 N4 | 101.2(6)  | N5 Co1 N3 | 103.3(6)  |
| N2 Co1 N1 | 88.4(6)   | N5 Co1 N4 | 100.3(7)  |
| N3 Co1 N1 | 155.5(4)  | N3 Co1 N1 | 155.6(4)  |
| N3 Co1 N2 | 87.6(2)   | N3 Co1 N2 | 87.5(2)   |
| N4 Co1 N1 | 86.4(2)   | N3 Co1 N4 | 87.4(7)   |
| N4 Co1 N2 | 155.4(4)  | N4 Co1 N1 | 86.26(19) |
| N4 Co1 N3 | 87.3(6)   | N4 Co1 N2 | 155.2(5)  |
| O9 N5 Co1 | 137(4)    | O9 N5 Co1 | 134.7(7)  |



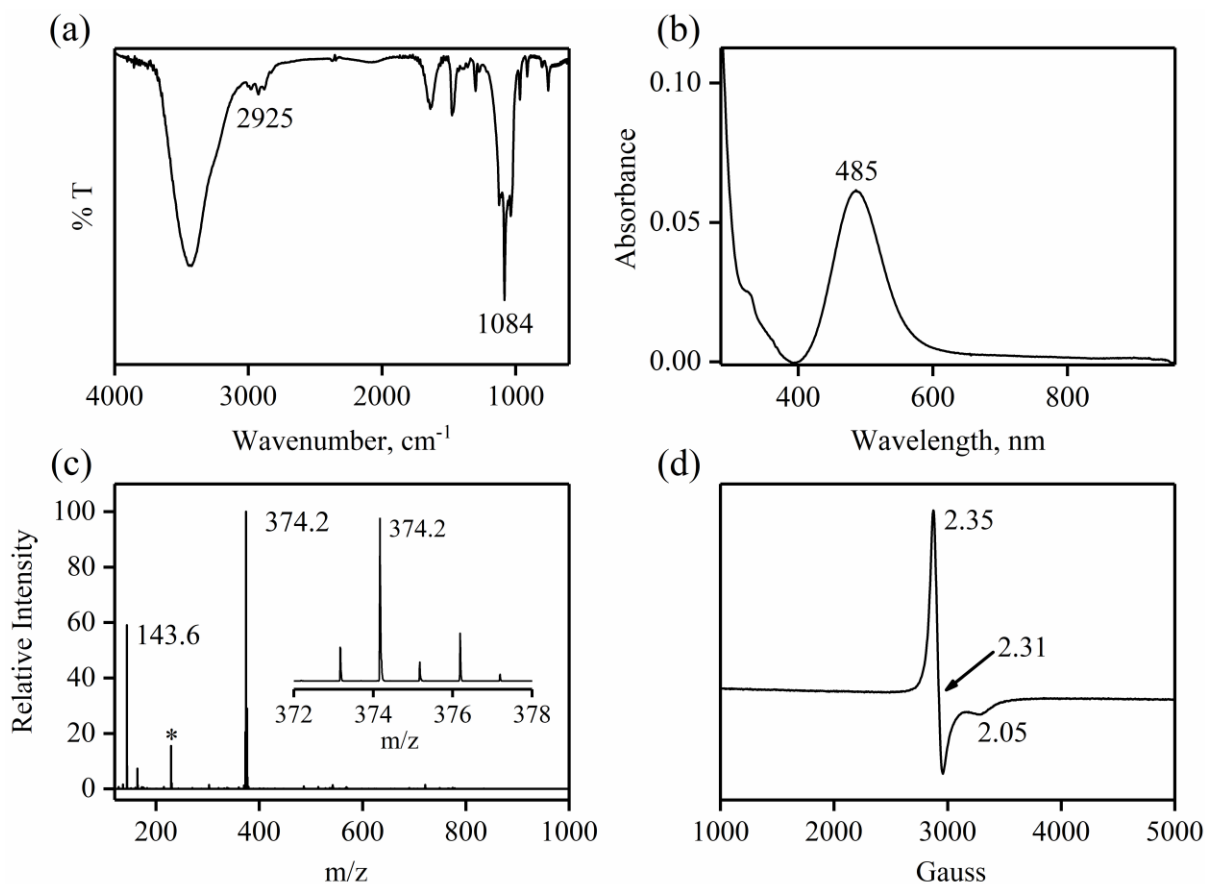

**Fig. S1.** (a) FT-IR spectrum of **1** recorded in KBr pellet at 298 K, showing the peaks for aliphatic chain ( $2925\text{ cm}^{-1}$ ) and tetrafluoroborate ( $1084\text{ cm}^{-1}$ ) (b) UV-vis spectrum of **1** ( $0.50\text{ mM}$ ) recorded in  $\text{CH}_3\text{CN}$  at 298 K. Spectrum showing here the characteristic absorption band at  $485\text{ nm}$  for complex **1**. (c) ESI-MS spectrum of **1** recorded in  $\text{CH}_3\text{CN}$ . The peaks at  $m/z$  143.6 and 347.2 are assigned to be  $[(12\text{-TMC})\text{Co}^{\text{II}}]^{2+}$  (calcd:  $m/z$  143.6) and  $[(12\text{-TMC})\text{Co}^{\text{II}}(\text{BF}_4)]^+$  (calcd:  $m/z$  374.2), respectively. The peak at  $m/z$  229.2 marked with asterisks is assigned to be protonated 12-TMC ligand  $[12\text{-TMCH}]^+$  (calcd:  $m/z$  229.2) (d) X-band EPR spectra of **1** ( $2.0\text{ mM}$ ; black line) recorded at 100 K.

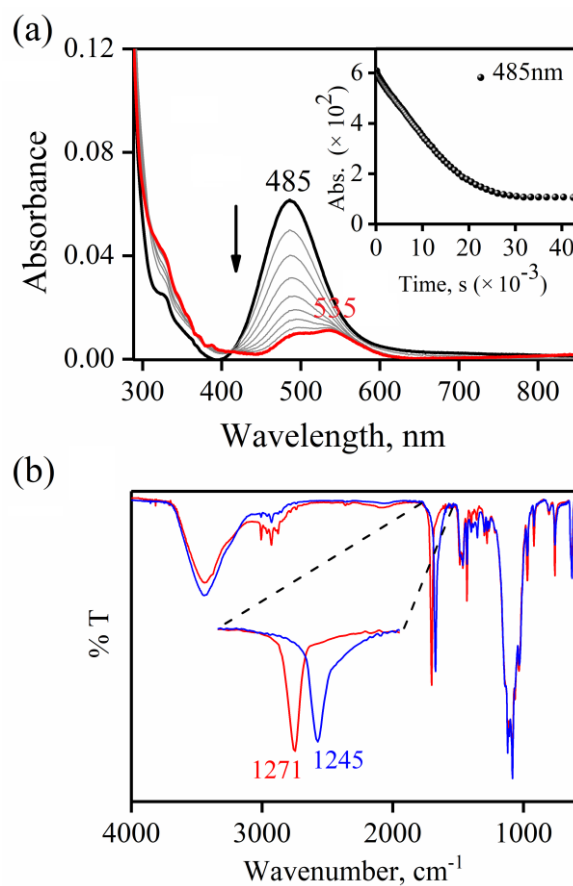

**Fig. S2.** (a) UV-vis spectra for the formation of **2**. The Inset shows the time course of the decay of **1** (black circles) monitored at 485 nm upon addition  $\text{NaNO}_2$  (1 equiv) to a solution of **1** (0.5 mM) in  $\text{CH}_3\text{CN}$  at 298 K. (b) FT-IR spectra of  $[(12\text{-TMC})\text{Co}^{\text{II}}(^{14}\text{NO}_2)]^+$  (red line) and  $[(12\text{-TMC})\text{Co}^{\text{II}}(^{15}\text{NO}_2)]^+$  recorded in KBr pellet at 298 K.

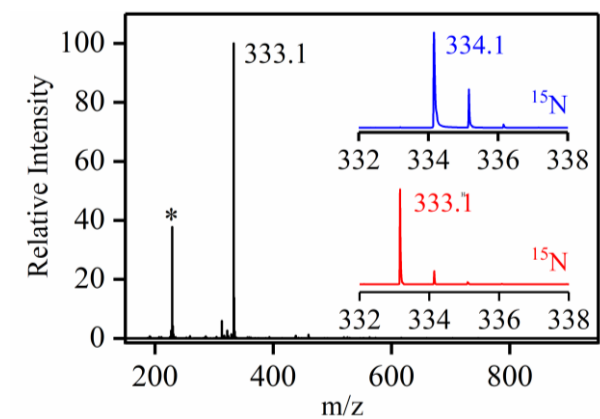

**Fig. S3.** ESI-MS spectrum of **2** recorded in CH<sub>3</sub>CN. The peak at  $m/z$  334.1 and  $m/z$  229.2 (\*) are assigned to be [(12-TMC)Co<sup>II</sup>(<sup>14</sup>NO<sub>2</sub>)]<sup>2+</sup> (calcd:  $m/z$  331.1) and protonated 12-TMC ligand [12-TMCH]<sup>+</sup> (calcd:  $m/z$  229.2). Inset: isotopic distribution pattern for **2**-<sup>14</sup>NO<sub>2</sub><sup>-</sup> (red line) and **2**-<sup>15</sup>NO<sub>2</sub><sup>-</sup> (blue line).

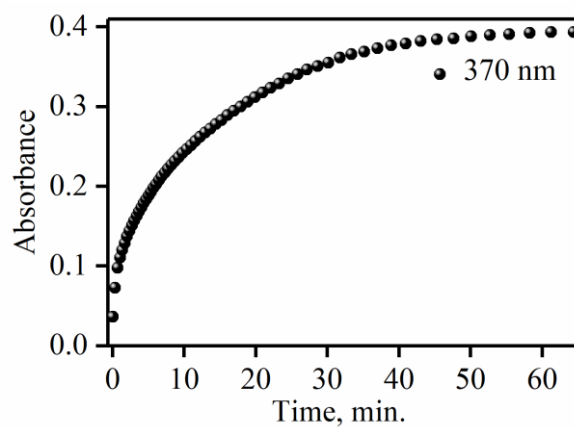

**Fig. S4.** Time course of the formation of **4** (black circles) monitored at 370 nm upon addition  $\text{HClO}_4$  ( $\text{H}^+$ , 1 equivalent) to a solution of **2** (0.5 mM) in  $\text{CH}_3\text{CN}$  at 298 K.

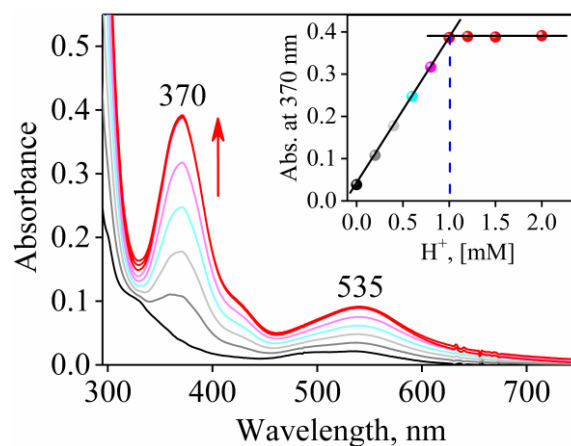

**Fig. S5.** (a) UV-vis spectral changes showing the formation of **4** (black line) by addition of HClO<sub>4</sub> (H<sup>+</sup> source) in increments of 0, 0.20, 0.40, 0.60, 0.8, 1.0, 1.2, 1.5, 2.0 equivalents under an Ar atmosphere in CH<sub>3</sub>CN at 298 K. The Inset shows the spectral titration monitored at 370 nm due to the formation of **4** as a function of the equivalents of HClO<sub>4</sub> (H<sup>+</sup> source) in increments of 0, 0.20, 0.40, 0.60, 0.8, 1.0, 1.2, 1.5, 2.0 equivalents.

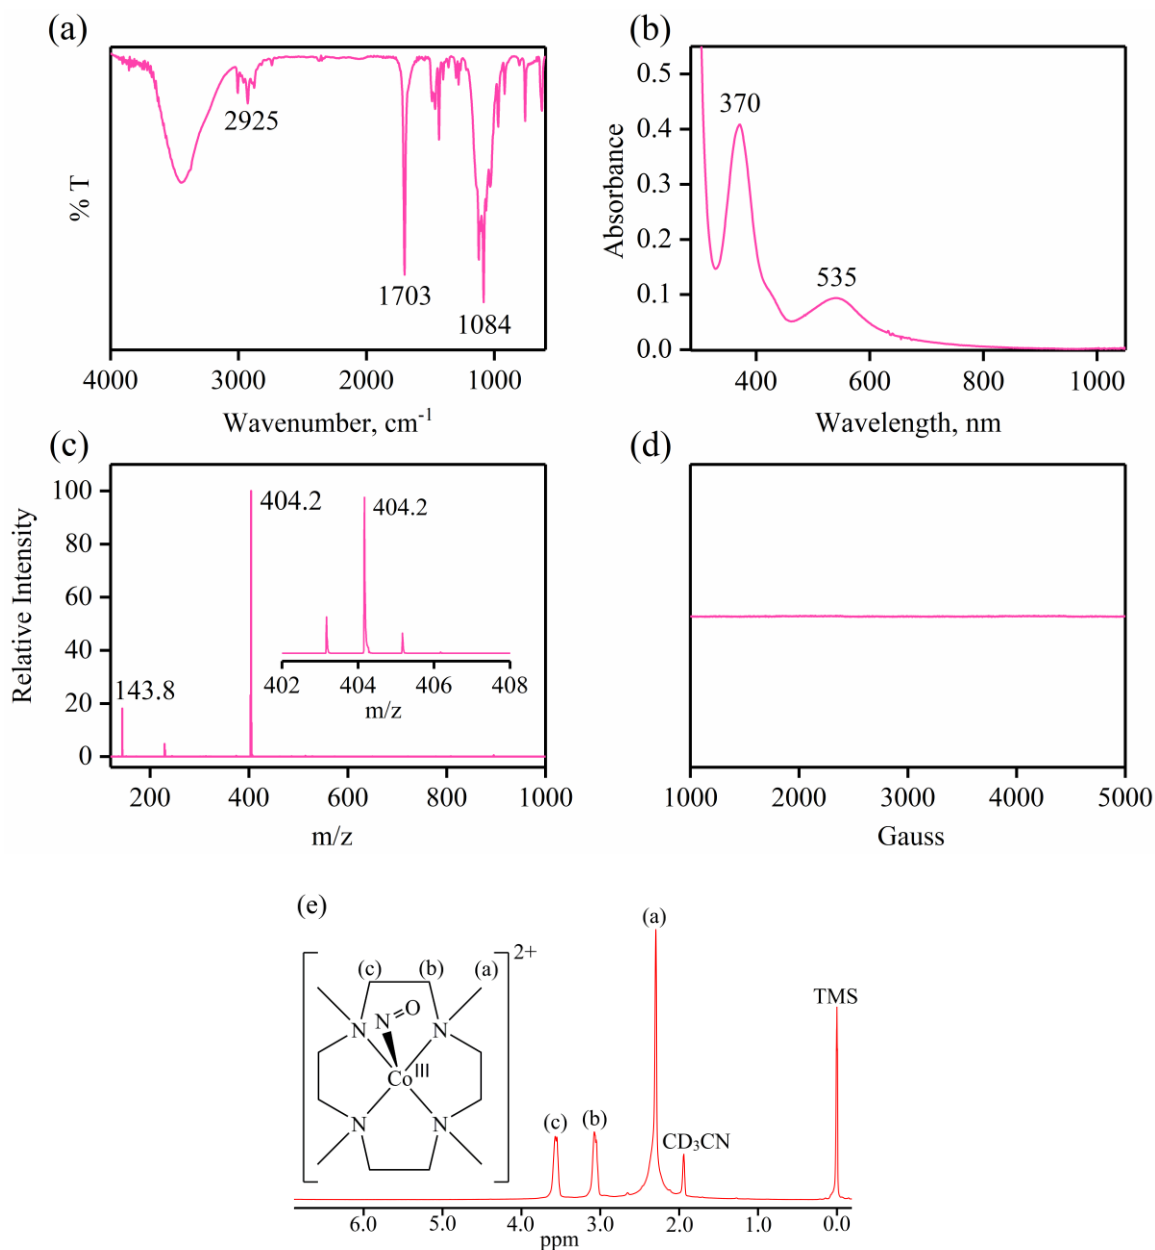

**Fig. S6.** (a) FT-IR spectrum of **5** recorded in KBr pellet at 298 K. The spectrum showed the peaks for aliphatic chain (2925 cm<sup>-1</sup>), Co<sup>III</sup>NO<sup>-</sup> (1703 cm<sup>-1</sup>), and for BF<sub>4</sub><sup>-</sup> (1084 cm<sup>-1</sup>). (b) UV-vis spectrum of **5** (0.50 mM) recorded in CH<sub>3</sub>CN at 298 K. Spectrum showing here the characteristic absorption band at 370 nm for complex **5**. (c) ESI-MS spectrum of **5** recorded in CH<sub>3</sub>CN. The peaks at *m/z* 143.8 and 404.2 are assigned to be [(12-TMC)Co<sup>II</sup>]<sup>2+</sup> (calcd: *m/z* 143.6) and [(12-TMC)Co<sup>II</sup>(NO)(BF<sub>4</sub>)]<sup>+</sup> (calcd: *m/z* 404.2), respectively. (d) X-band EPR spectrum of **5** (2.0 mM) recorded at 100 K. (e) <sup>1</sup>H-NMR (400 MHz) spectra of complex **5** (40 mM) in CD<sub>3</sub>CN at RT.

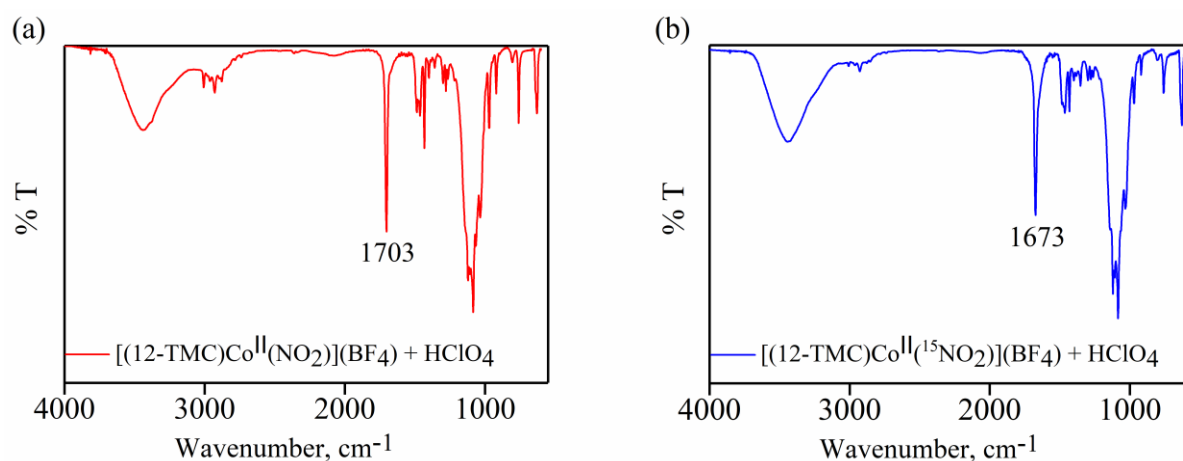

**Fig. S7.** FT-IR spectrum of (a) reaction mixture, ( $[(12\text{-TMC})\text{Co}^{\text{II}}(^{14}\text{NO}_2)]^{2+}$ , 40 mM + HClO<sub>4</sub>, 40 mM), recorded after completion of reaction in KBr pellet at 298 K. The spectrum showed the peaks for aliphatic chain (2925 cm<sup>-1</sup>), {Co<sup>14</sup>NO}<sup>8</sup> (1703 cm<sup>-1</sup>), and addition peak for ClO<sub>4</sub><sup>-</sup> + BF<sub>4</sub><sup>-</sup> (1050 to 1180 cm<sup>-1</sup>). (b) Reaction mixture, ( $[(12\text{-TMC})\text{Co}^{\text{II}}(^{15}\text{NO}_2)]^{2+}$ , 40 mM + HClO<sub>4</sub>, 40 mM), recorded after completion of reaction in KBr pellet at 298 K. The spectrum showed the peaks for aliphatic chain (2925 cm<sup>-1</sup>), {Co<sup>15</sup>NO}<sup>8</sup> (1673 cm<sup>-1</sup>), and addition peak for ClO<sub>4</sub><sup>-</sup> + BF<sub>4</sub><sup>-</sup> (1050 to 1180 cm<sup>-1</sup>).

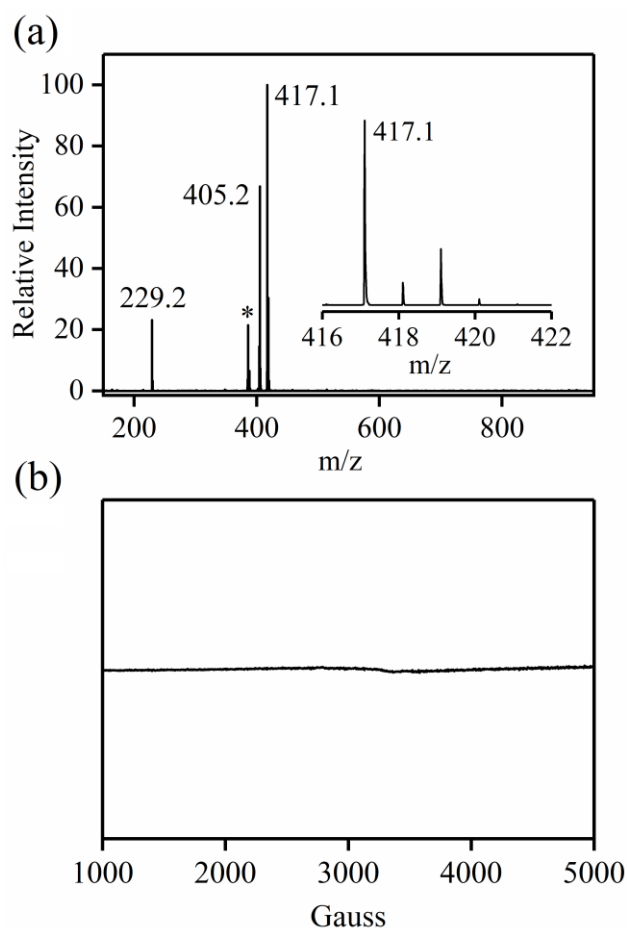

**Fig. S8.** ESI-MS spectrum of **4** recorded in  $\text{CH}_3\text{CN}$ . The peaks at  $m/z$  229.2, 405.2 and 417.1 are assigned to be protonated 12-TMC ligand  $[\text{12-TMCH}]^+$  (calcd  $m/z$  229.2),  $[(\text{12-TMC})\text{Co}^{\text{III}}(^{15}\text{NO})(\text{BF}_4)]^+$  (calcd  $m/z$  405.2) and  $[(\text{12-TMC})\text{Co}^{\text{III}}(^{15}\text{NO})(\text{ClO}_4)]^+$  (calcd  $m/z$  417.1), respectively. The peak at  $m/z$  386.1 marked with asterisks is assigned to be protonated 12-TMC ligand  $[(\text{12-TMC})\text{Co}^{\text{II}}(\text{ClO}_4)]^+$  (calcd  $m/z$  386.1). (b) X-band EPR spectrum of **5**- $^{14}\text{NO}$  (2.0 mM) recorded at 100 K.



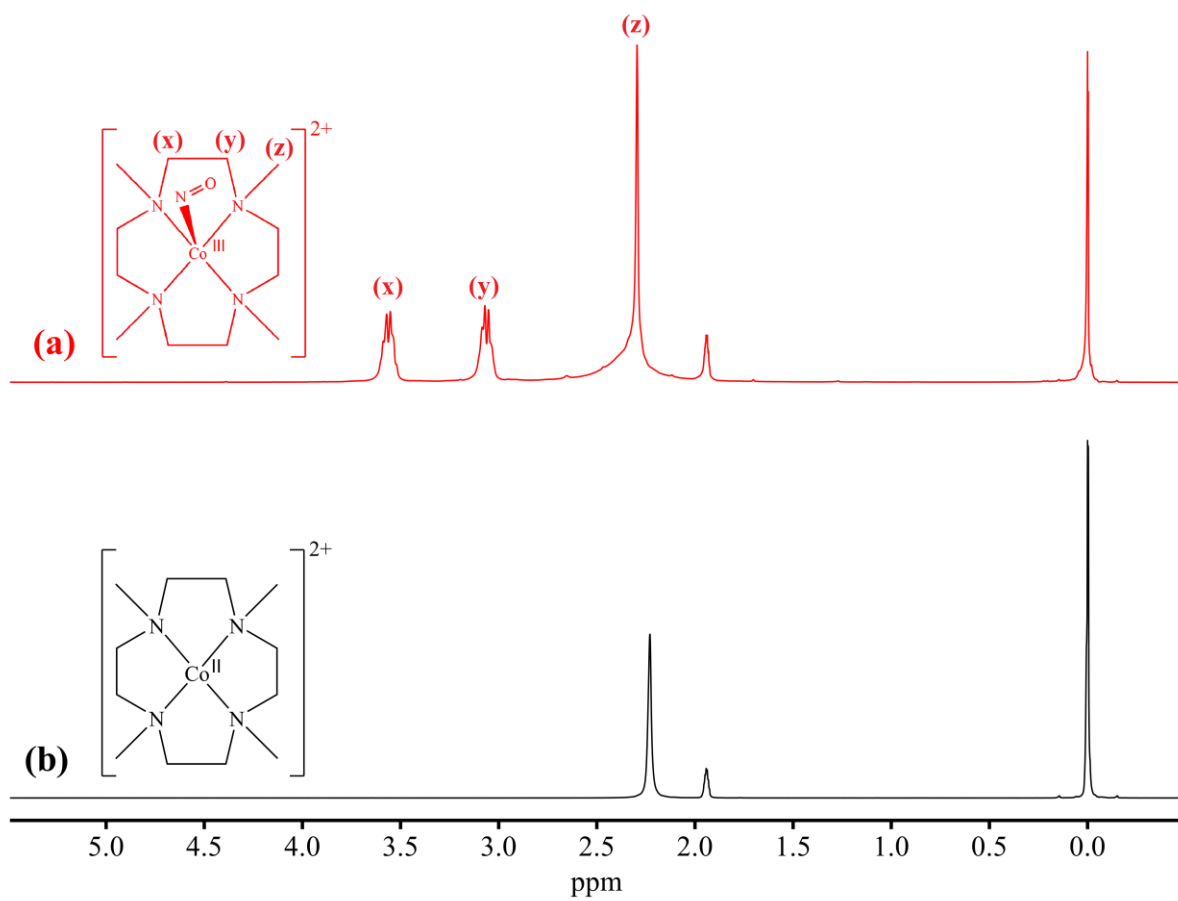

**Fig. S9.** <sup>1</sup>H-NMR (400 MHz) spectra of (a) reaction mixture (**2**, 40 mM + HClO<sub>4</sub>, 40 mM) and (b) complex **1** (40 mM) in CD<sub>3</sub>CN at RT.

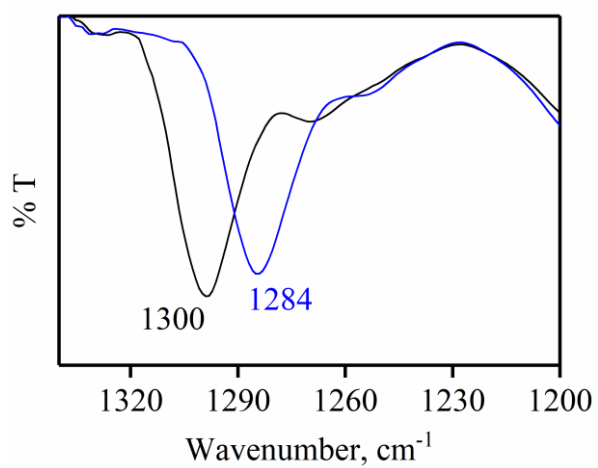

**Fig. S10.** Solution IR spectra of [(12-TMC)Co<sup>II</sup>(NO<sub>2</sub>)]<sup>+</sup> (**2**, black line) and [(12-TMC)Co<sup>II</sup>(ONOH)]<sup>+</sup> (**3**, blue line) recorded in CH<sub>3</sub>CN at 298 K.

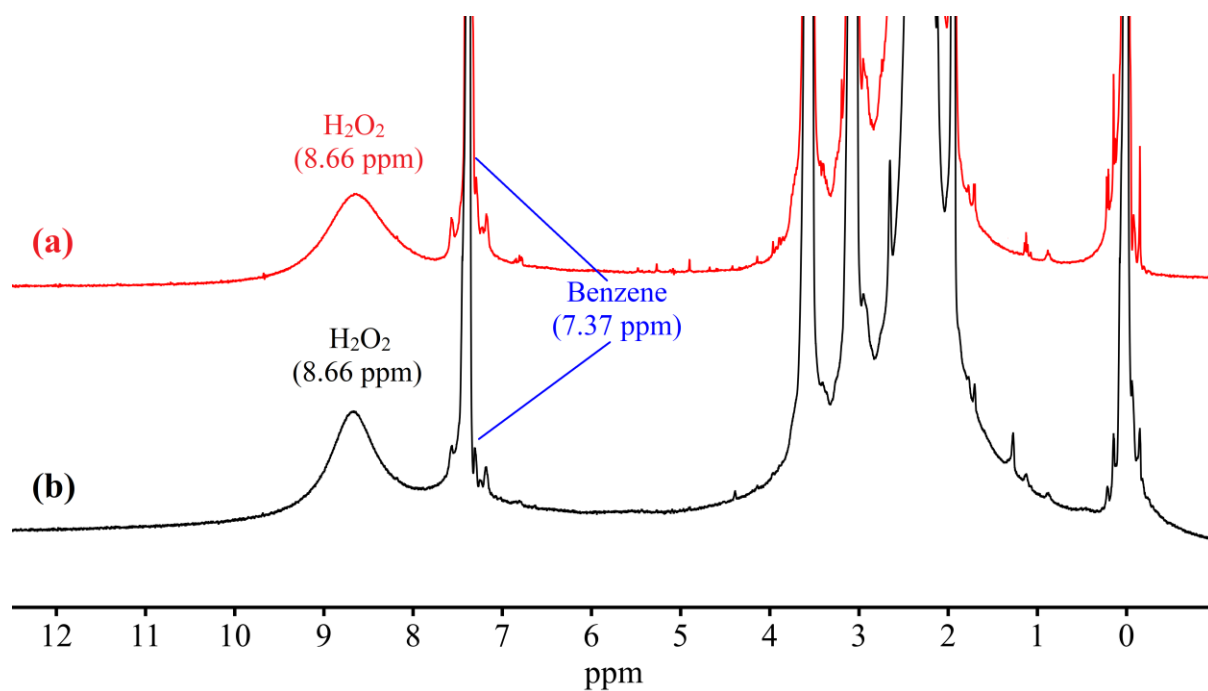

**Fig. S11.** <sup>1</sup>H-NMR (400 MHz) spectra of (a) reaction mixture (**2**, 40 mM + HClO<sub>4</sub>, 40 mM) and (b) authentic sample (H<sub>2</sub>O<sub>2</sub>, 20 mM + **5**, 40 mM) using benzene as an internal standard in CD<sub>3</sub>CN at RT.

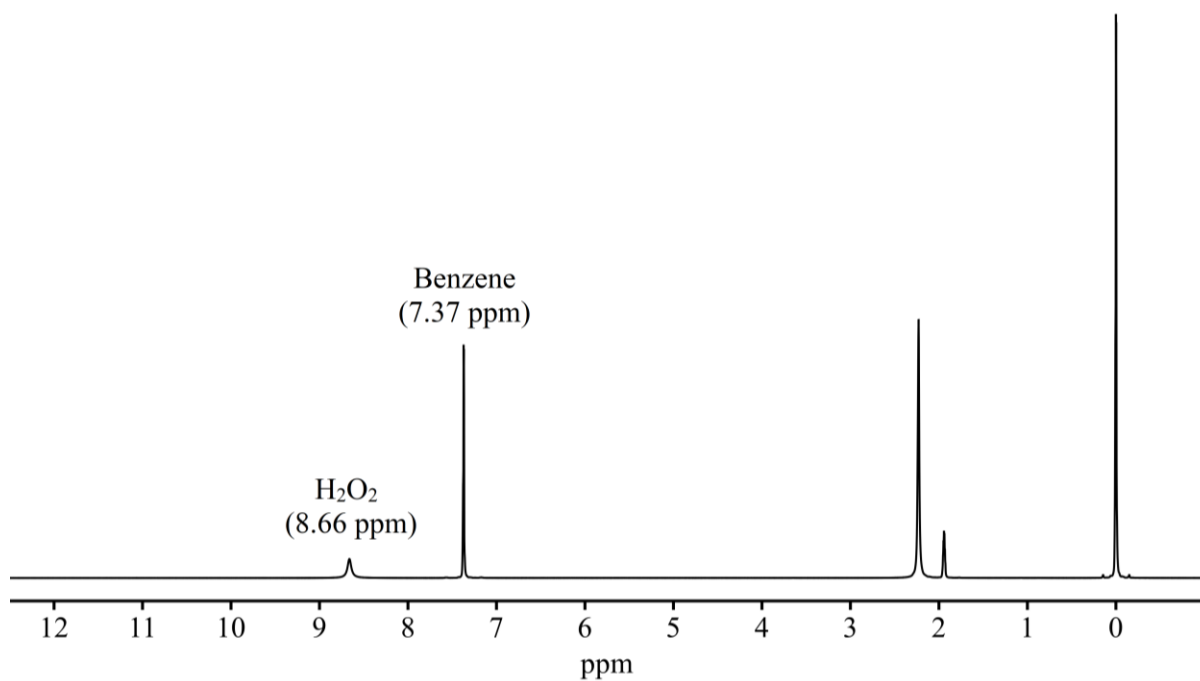

**Fig. S12.** <sup>1</sup>H-NMR (400 MHz) spectra of H<sub>2</sub>O<sub>2</sub> (20 mM) using benzene as an internal standard in CD<sub>3</sub>CN at RT.

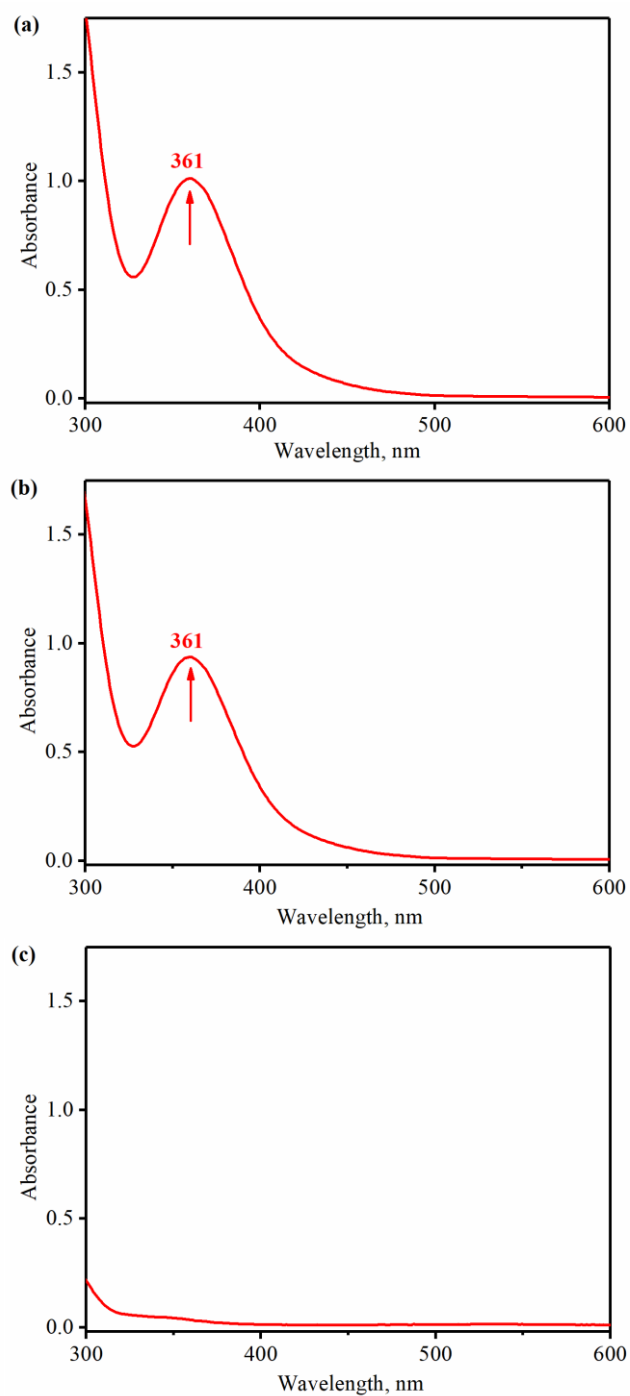

**Fig. 13.** (a) UV-vis spectrum complex **2** (0.01 mM) with one equivalent of perchloric acid (0.01 mM) in CH<sub>3</sub>CN under an Ar atmosphere at 298 K. (b) UV-vis spectrum of complex **2** (0.01 mM) with 4 equivalent of perchloric acid (0.04 mM) in CH<sub>3</sub>CN under an Ar atmosphere at 298 K. (c) UV-vis spectrum of reaction mixture (0.01 mM) obtained after the spin trapping experiment in CH<sub>3</sub>CN under an Ar atmosphere at 298 K.

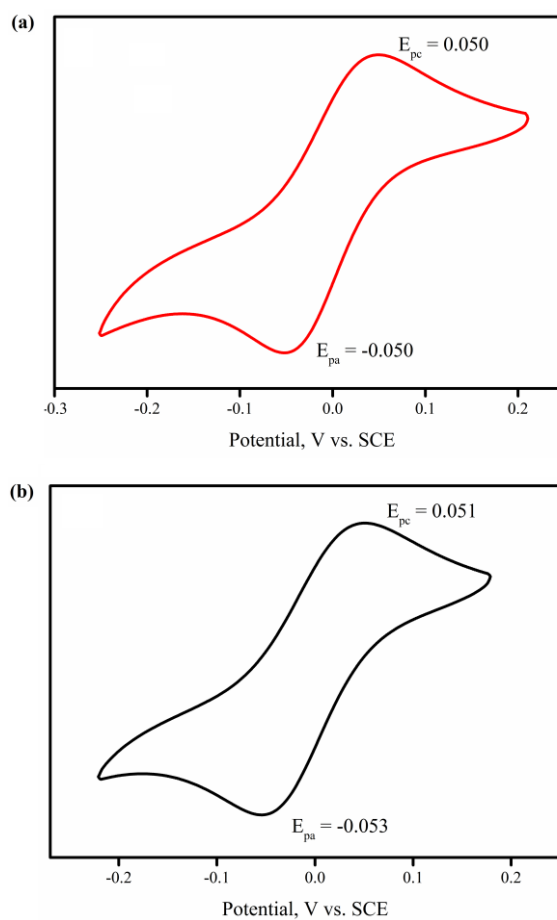

**Fig. S14.** Cyclic voltammogram of (a) **4** (5.0 mM) and (b) **4** (5.0 mM) + H<sub>2</sub>O<sub>2</sub> (2.5 mM) in CH<sub>3</sub>CN containing n-Bu<sub>4</sub>NClO<sub>4</sub> (0.1 M) as a supporting electrolyte (scan rate = 0.10 V s<sup>-1</sup>).

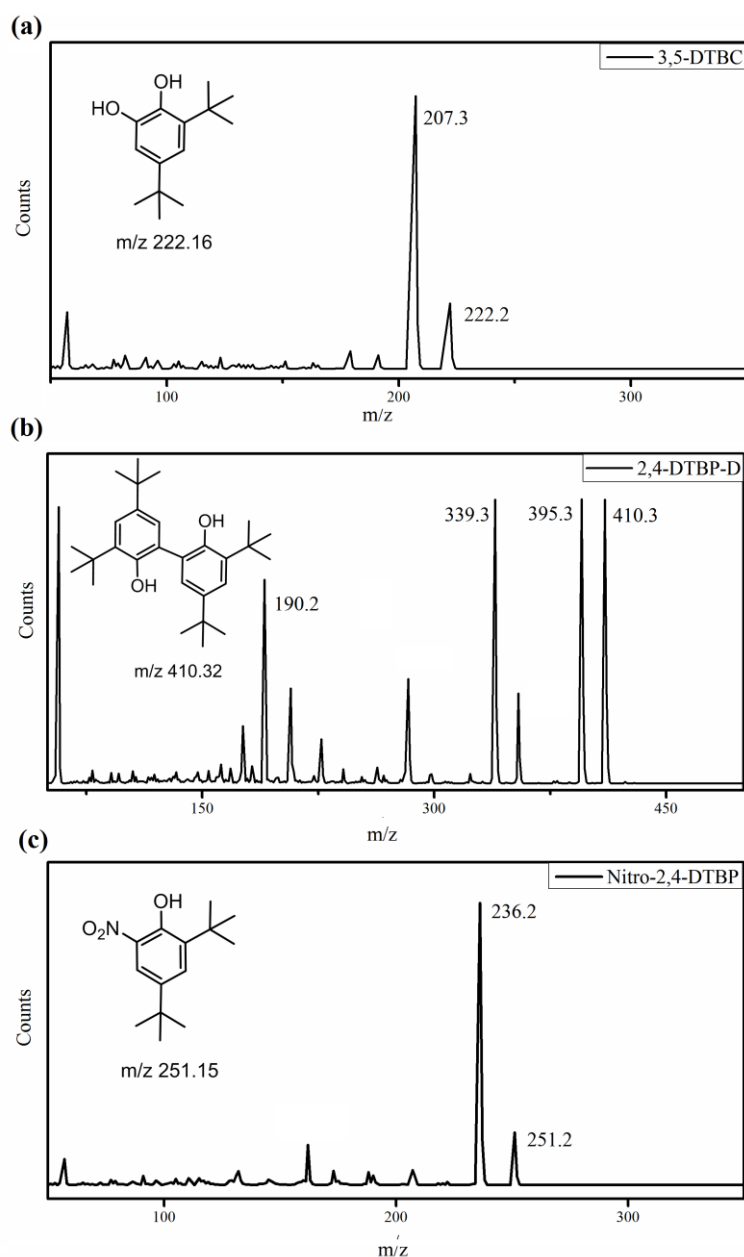

**Fig. S15.** GC-MS characterisation of (a) 3,5-Di-*tert*-butylcatechol (3,5-DTBC); The peak at  $m/z$  value 222.2, 207.3 are assigned to 3,5-DTBC and  $\text{CH}_3$  loss from 3,5-DTBC respectively. (b) 2,4-DTBP-dimer (2,4-DTBP-D); The peaks at  $m/z$  410.3, 395.3, 339.3 and 190.2 are assigned to be 2,4-DTBP-D, loss of  $\text{CH}_3$  from 2,4-DTBP-D, loss of  $\text{C}_4\text{H}_8$  and  $\text{CH}_3$  from 2,4-DTBP-D and loss of  $\text{CH}_3$  from monomer 2,4-DTBP (c) nitro-2,4-DTBP (nitro-2,4-DTBP): The peaks at  $m/z$  251.2 and 236.2 are assigned to be nitro-2,4-DTBP and loss of  $\text{CH}_3$  from nitro-2,4-DTBP. The peaks were compared with the NIST standard library.

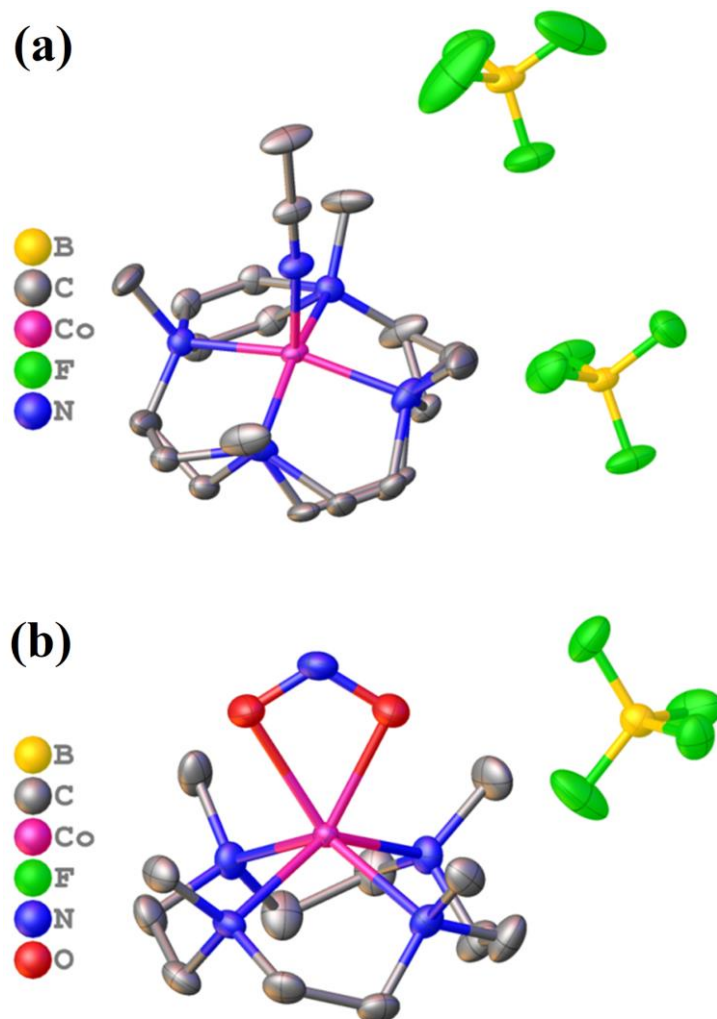

**Fig. S16:** ORTEP diagram of **1** (a) and **2** (b) with 30 % probability. The disordered portions in the anions are removed for clarity.



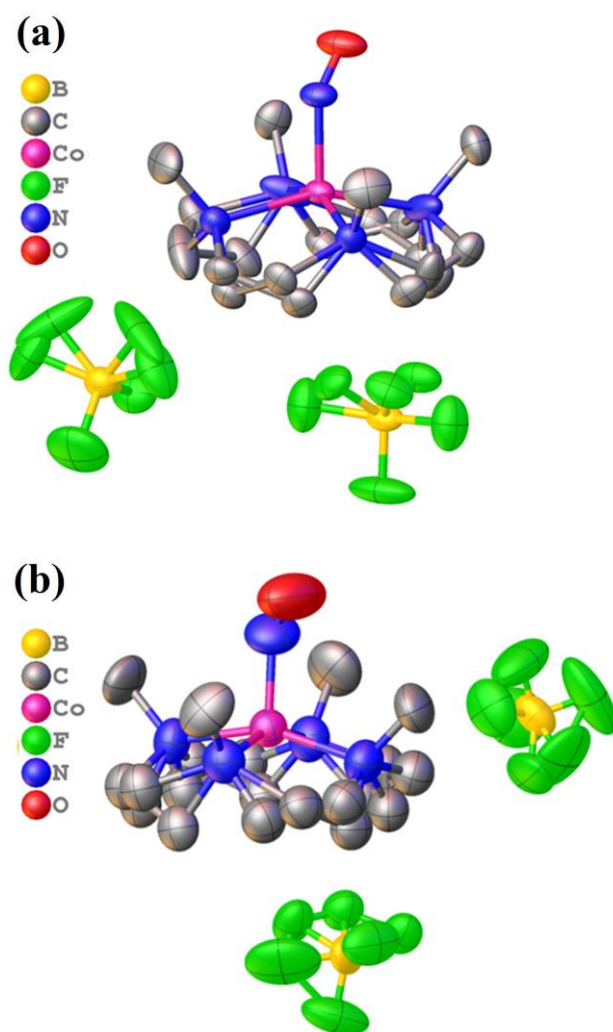

**Fig. S18:** ORTEP diagram of **4** (a) and **5** (b) with 30 % probability. The disordered portions in the anions of  $\text{BF}_4$  are removed for clarity.

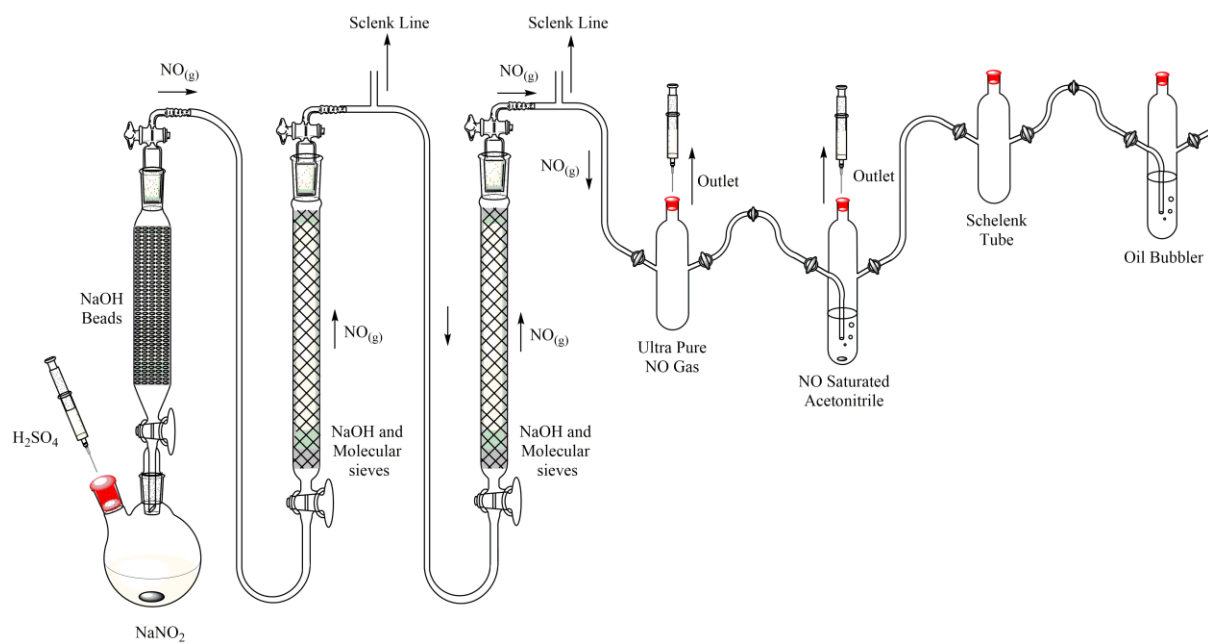

**Fig. S19.** Schematic diagram showing the generation and purification setup for NO.
